# Supplementary material
Source: MDPI journal article supplement (https://www.mdpi.com/2073-4441/14/19/3162)
Supplement: s1 [file s1]

## **Supplementary Material**

### **Optimization of Cultivation Conditions for *Tetraselmis striata* and Biomass**

#### **Quality Evaluation for Fish Feed Production**

**Vasiliki Patrinou <sup>1</sup>, Alexandra Daskalaki <sup>2</sup>, Dimitris Kampantais <sup>3</sup>, Dimitris C. Kanakis <sup>3</sup>, Christina N. Economou <sup>4</sup>, Dimitris Bokas <sup>5</sup>, Yannis Kotzamanis <sup>3</sup>, George Aggelis <sup>2</sup>, Dimitris V. Vayenas <sup>4</sup> and Athanasia G. Tekerlekopoulou <sup>1,\*</sup>**

<sup>1</sup>Department of Environmental Engineering, University of Patras, G. Seferi 2, Agrinio 30100, Greece

<sup>2</sup>Department of Biology, University of Patras, Patras, 26500, Greece

<sup>3</sup>Hellenic Centre for Marine Research / Institute of Marine Biology, Biotechnology and Aquaculture, 46.7 km Athens Sounio Ave., Anavyssos, 19013, Greece

<sup>4</sup>Department of Chemical Engineering, University of Patras, Patras, 26500, Greece

<sup>5</sup>PLAGTON S.A., Thesi Konaki Skentou, Municipality of Xiromeros Aitolioakarnania, Greece

\*Correspondence: atekerle@upatras.gr; Tel.: +30-26410-74204

**Table S1.** Physicochemical characterization of the drilling waters.

| Parameter                                            | Drill 1     | Drill 2     |
|------------------------------------------------------|-------------|-------------|
| pH                                                   | 7.74 ± 0.1  | 7.79 ± 0.11 |
| Electrical Conductivity<br>(ms cm <sup>-1</sup> )    | 63.2 ± 4.8  | 44 ± 4.9    |
| Total salinity (%)                                   | 3.9 ± 0.1   | 2.8 ± 0.1   |
| Total Suspended Solids<br>(TSS) (g L <sup>-1</sup> ) | 0.46 ± 0.05 | 0.27 ± 0.03 |
| Total Dissolved Solids<br>(TDS) (g L <sup>-1</sup> ) | 39.44 ± 2.4 | 24.36 ± 2.8 |

|                                                       |             |             |
|-------------------------------------------------------|-------------|-------------|
| BOD (mg O <sub>2</sub> L <sup>-1</sup> )              | 1.0 ± 0.0   | 0.0 ± 0.0   |
| d-COD (mg O <sub>2</sub> L <sup>-1</sup> )            | 6.0 ± 4.2   | 5.3 ± 1.2   |
| NH <sub>4</sub> <sup>+</sup> -N (mg L <sup>-1</sup> ) | 0.04 ± 0.02 | 0.10 ± 0.05 |
| NO <sub>3</sub> <sup>-</sup> -N (mg L <sup>-1</sup> ) | 0.21 ± 0.10 | 0.50 ± 0.21 |
| NO <sub>2</sub> <sup>-</sup> -N (mg L <sup>-1</sup> ) | 0.00 ± 0.00 | 0.00 ± 0.00 |
| PO <sub>4</sub> <sup>3-</sup> (mg L <sup>-1</sup> )   | 0.34 ± 0.10 | 0.43 ± 0.20 |

**Table S2.** Nutrient composition of all tested growth substrates.

| Growth substrate                                                                | Medium components                                                                                                         | Quantity (g L <sup>-1</sup> ) |
|---------------------------------------------------------------------------------|---------------------------------------------------------------------------------------------------------------------------|-------------------------------|
| Experimental set A<br>Salinity 3.9 ± 0.1%<br>N <sup>1</sup> : P <sup>2</sup> ≈5 | (NH <sub>4</sub> ) <sub>2</sub> SO <sub>4</sub>                                                                           | 0.0944                        |
|                                                                                 | KNO <sub>3</sub>                                                                                                          | 0.0722                        |
|                                                                                 | K <sub>2</sub> HPO <sub>4</sub>                                                                                           | 0.0225                        |
|                                                                                 | KH <sub>2</sub> PO <sub>4</sub>                                                                                           | 0.0090                        |
| Experimental set B<br>Salinity 3.9 ± 0.1%<br>N: P ≈12                           | (NH <sub>4</sub> ) <sub>2</sub> SO <sub>4</sub>                                                                           | 0.2832                        |
|                                                                                 | KNO <sub>3</sub>                                                                                                          | 0.0750                        |
|                                                                                 | K <sub>2</sub> HPO <sub>4</sub>                                                                                           | 0.0262                        |
|                                                                                 | KH <sub>2</sub> PO <sub>4</sub>                                                                                           | 0.0102                        |
| Experimental set C<br>Salinity 2.8 ± 0.1%<br>N: P ≈12                           | (NH <sub>4</sub> ) <sub>2</sub> SO <sub>4</sub>                                                                           | 0.2832                        |
|                                                                                 | KNO <sub>3</sub>                                                                                                          | 0.0750                        |
|                                                                                 | K <sub>2</sub> HPO <sub>4</sub>                                                                                           | 0.0262                        |
|                                                                                 | KH <sub>2</sub> PO <sub>4</sub>                                                                                           | 0.0102                        |
| Experimental set D<br>Salinity 2.8 ± 0.1%<br>Modified F/2<br>N: P ≈10           | (NH <sub>4</sub> ) <sub>2</sub> SO <sub>4</sub>                                                                           | 0.2120                        |
|                                                                                 | NaH <sub>2</sub> PO <sub>4</sub> ·H <sub>2</sub> O                                                                        | 0.0240                        |
|                                                                                 | <u>Mixed solution</u><br>(Solution B and trace element stocks)                                                            | 1 mL L <sup>-1</sup>          |
|                                                                                 | <u>Details for mixed solution:</u><br>In solution B we add 1 mL of each trace element stock                               |                               |
|                                                                                 | <u>Solution B contains in g L<sup>-1</sup>:</u><br>Na <sub>2</sub> EDTA 4.36<br>FeCl <sub>3</sub> ·6H <sub>2</sub> O 3.15 |                               |
|                                                                                 | <u>Trace element stock of CuSO<sub>4</sub>·5H<sub>2</sub>O contains:</u><br>10 g L <sup>-1</sup>                          |                               |
|                                                                                 | <u>Trace element stock of ZnSO<sub>4</sub>·7H<sub>2</sub>O contains:</u><br>22 g L <sup>-1</sup>                          |                               |
|                                                                                 | <u>Trace element stock of CoCl<sub>2</sub>·6H<sub>2</sub>O contains:</u><br>10 g L <sup>-1</sup>                          |                               |
|                                                                                 |                                                                                                                           |                               |
|                                                                                 |                                                                                                                           |                               |

|                                                                                                             |                                                                                                                                                                                                                                                                                                           |      |
|-------------------------------------------------------------------------------------------------------------|-----------------------------------------------------------------------------------------------------------------------------------------------------------------------------------------------------------------------------------------------------------------------------------------------------------|------|
|                                                                                                             | <u>Trace element stock of</u><br><u>MnCl<sub>2</sub>·4H<sub>2</sub>O contains:</u><br>180 g L <sup>-1</sup><br><br><u>Trace element stock of</u><br><u>Na<sub>2</sub>MoO<sub>4</sub>·2H<sub>2</sub>O contains:</u><br>6 g L <sup>-1</sup>                                                                 |      |
| Experimental set E<br>Salinity 2.8 ± 0.1%<br>Fertilizer Nutri-Leaf<br>without NaHCO <sub>3</sub><br>N: P ≈7 | <u>Nutri-Leaf 30-10-10</u><br><br><u>Composition:</u><br>Total nitrogen 30% of<br>which:<br>Nitrate nitrogen 3%<br>Ammonium nitrogen 3.7%<br>Urea 23.3%<br>P <sub>2</sub> O <sub>5</sub> 10%<br>K <sub>2</sub> P 10%<br>Mg 0.0251%<br>B 0.02%<br>Cu 0.05%<br>Fe 0.1%<br>Mn 0.05%<br>Mo 0.001%<br>Zn 0.05% | 0.05 |
| Experimental set F<br>Salinity 2.8 ± 0.1%<br>Fertilizer Nutri-Leaf<br>with NaHCO <sub>3</sub><br>N: P ≈7    | Nutri-Leaf 30-10-10                                                                                                                                                                                                                                                                                       | 0.05 |
|                                                                                                             | NaHCO <sub>3</sub>                                                                                                                                                                                                                                                                                        | 0.18 |

<sup>1</sup>N=Nitrogen, <sup>2</sup>P= Phosphorus.

**Table S3.** Fatty acid composition (%) of total lipids (TL), neutral lipids (NL), glycolipids (GL) and phospholipids (PL) synthesized by *T. striata* growing under different pH conditions.

| pH value | Lipid fraction | Lipid fraction<br>(%, w/w) in TL | Fatty acid composition (%, w/w) |       |       |       |           |       |           |           |        |        |        |
|----------|----------------|----------------------------------|---------------------------------|-------|-------|-------|-----------|-------|-----------|-----------|--------|--------|--------|
|          |                |                                  | C14:0                           | C16:0 | C16:1 | C18:0 | C18:1 n-9 | C18:2 | C20:1 n-9 | C20:5 n-3 | ΣPUFAs | ΣMUFAs | ΣSFAs  |
| pH 8.0   | TL             |                                  | 4.8                             | 18.5  | 24.7  | 0.8 ± | 8.3       | 5.1   | 3.1       | 27.6      | 33.2   | 36.2   | 24.1 ± |
|          |                |                                  | ± 0.1                           | ± 0.1 | ± 2.0 | 0.3   | ± 0.9     | ± 0.7 | ± 0.5     | ± 1.6     | ± 1.3  | ± 1.5  | 0.2    |
|          | NL             | 37.1 ± 1.0                       | 2.8                             | 22.1  | 27.0  | 2.4 ± | 21.3      | 5.5   | 3.7       | 10.1      | 15.6   | 52.0   | 27.2 ± |
|          |                |                                  | ± 0.3                           | ± 0.2 | ± 0.6 | 0.5   | ± 0.0     | ± 0.3 | ± 0.3     | ± 0.6     | ± 0.8  | ± 1.3  | 0.1    |
|          | GL             | 47.9 ± 0.7                       | 5.8                             | 16.8  | 15.7  | 0.8   | 7.0       | 1.6   | 2.3       | 35.1      | 36.6   | 24.9   | 23.4 ± |
|          |                |                                  | ± 0.0                           | ± 0.3 | ± 0.8 | ± 0.1 | ± 0.9     | ± 0.8 | ± 0.2     | ± 1.4     | ± 1.1  | ± 0.6  | 0.1    |
|          | PL             | 15.0 ± 1.1                       | 3.7                             | 23.6  | 16.2  | 1.6   | 20.1      | 12.6  | 3.6       | 11.4      | 24.0   | 39.9   | 28.9 ± |
|          |                |                                  | ± 0.7                           | ± 1.1 | ± 1.3 | ± 0.2 | ± 1.5     | ± 0.8 | ± 0.1     | ± 0.7     | ± 0.6  | ± 0.9  | 1.3    |
| pH 7.0   | TL             |                                  | 5.0                             | 29.8  | 27.3  | 0.5   | 9.9       | 5.2   | 3.3       | 14.0      | 19.2   | 40.5   | 35.4 ± |
|          |                |                                  | ± 0.3                           | ± 2.1 | ± 1.7 | ± 0.3 | ± 0.3     | ± 0.1 | ± 0.3     | ± 1.3     | ± 1.1  | ± 0.9  | 1.5    |
|          | NL             | 48.0 ± 0.9                       | 4.8                             | 35.4  | 33.4  | 0.9   | 11.1      | 4.9   | 2.6       | 4.4       | 9.3    | 47.1   | 41.1 ± |
|          |                |                                  | ± 0.1                           | ± 1.9 | ± 0.9 | ± 0.0 | ± 0.9     | ± 0.3 | ± 0.2     | ± 0.3     | ± 0.1  | ± 1.3  | 1.3    |
|          | GL             | 41.8 ± 1.5                       | 6.2                             | 24.5  | 18.2  | 0.7   | 5.8       | 3.0   | 2.6       | 18.8      | 21.8   | 26.6   | 31.4   |
|          |                |                                  | ± 0.1                           | ± 2.2 | ± 1.5 | ± 0.2 | ± 0.7     | ± 0.2 | ± 0.1     | ± 1.5     | ± 1.1  | ± 0.8  | 1.5    |
|          | PL             | 10.2 ± 0.9                       | 2.6                             | 17.5  | 16.9  | 2.4   | 27.5      | 15.9  | 4.0       | 9.1       | 25.0   | 48.4   | 22.5   |
|          |                |                                  | ± 0.4                           | ± 1.7 | ± 0.8 | ± 1.2 | ± 2.3     | ± 0.7 | ± 0.6     | ± 0.9     | ± 0.8  | ± 0.5  | ± 1.1  |

**Table S4.** Fatty acid composition (%) of total lipids (TL), neutral lipids (NL), glycolipids (GL) and phospholipids (PL) synthesized by *T. striata* growing under different temperature conditions.

| Temperature | Lipid class | Lipid fraction (%<br>w/w) in TL | Fatty acid composition (%<br>w/w) |       |       |       |           |       |           |           |        |        |       |
|-------------|-------------|---------------------------------|-----------------------------------|-------|-------|-------|-----------|-------|-----------|-----------|--------|--------|-------|
|             |             |                                 | C14:0                             | C16:0 | C16:1 | C18:0 | C18:1 n-9 | C18:2 | C20:1 n-9 | C20:5 n-3 | ΣPUFAs | ΣMUFAs | ΣSFAs |
| 19 ± 1 °C   | TL          |                                 | 6.0                               | 26.0  | 24.2  | 0.6   | 9.2       | 4.4   | 3.1       | 20.4      | 25.1   | 36.5   | 32.6  |
|             |             |                                 | ± 0.3                             | ± 2.1 | ± 0.8 | ± 0.1 | ± 0.7     | ± 0.9 | ± 0.5     | ± 1.3     | ± 1.1  | ± 0.4  | ± 1.5 |
|             | NL          | 42.4 ± 0.8                      | 7.7                               | 24.2  | 29.0  | 0.6   | 8.8       | 5.7   | 3.6       | 16.4      | 22.6   | 41.5   | 32.5  |
|             |             |                                 | ± 0.6                             | ± 1.0 | ± 1.1 | ± 0.0 | ± 0.2     | ± 0.8 | ± 0.3     | ± 1.5     | ± 1.4  | ± 0.8  | ± 0.9 |
|             | GL          | 38.8 ± 1.8                      | 5.5                               | 23.0  | 17.5  | 0.4   | 4.9       | 3.0   |           | 26.5      | 29.5   | 22.5   | 28.9  |
|             |             |                                 | ± 0.1                             | ± 1.8 | ± 0.9 | ± 0.2 | ± 0.1     | ± 0.4 | -*        | ± 0.9     | ± 0.8  | ± 0.7  | ± 1.7 |
|             | PL          | 18.8 ± 1.7                      | 2.5                               | 15.5  | 20.2  |       | 20.4      | 16.1  | 6.2       | 17.2      | 34.2   | 46.9   | 17.9  |
|             |             |                                 | ± 0.4                             | ± 0.4 | ± 0.7 | -*    | ± 1.3     | ± 1.4 | ± 0.3     | ± 0.8     | ± 1.0  | ± 1.1  | ± 0.4 |
| 25 ± 1 °C   | TL          |                                 | 5.2                               | 34.6  | 24.9  | 0.9   | 8.2       | 4.0   | 2.4       | 16.6      | 20.7   | 35.5   | 40.7  |
|             |             |                                 | ± 0.2                             | ± 1.6 | ± 1.9 | ± 0.4 | ± 0.7     | ± 0.1 | ± 0.6     | ± 1.1     | ± 1.4  | ± 0.9  | ± 1.4 |
|             | NL          | 44.2 ± 0.9                      | 4.7                               | 39.1  | 31.8  | 1.4   | 10.0      | 4.1   | 1.9       | 6.2       | 10.2   | 43.7   | 43.8  |
|             |             |                                 | ± 0.1                             | ± 1.4 | ± 2.2 | ± 0.8 | ± 1.7     | ± 1.1 | ± 0.7     | ± 0.3     | ± 0.8  | ± 1.2  | ± 1.1 |
|             | GL          | 45.9 ± 2.0                      | 5.9                               | 37.4  | 25.6  | 1.0   | 6.7       | 3.0   |           | 11.0      | 14.0   | 32.3   | 44.3  |
|             |             |                                 | ± 0.8                             | ± 1.5 | ± 1.7 | ± 0.0 | ± 0.9     | ± 0.9 | -*        | ± 0.8     | ± 1.3  | ± 0.7  | ± 0.8 |
|             | PL          | 9.9 ± 0.7                       |                                   |       |       |       |           |       |           |           |        |        |       |
|             |             |                                 | 3.3                               | 19.6  | 11.9  | 1.0   | 19.2      | 12.9  | 10.3      | 16.5      | 31.1   | 41.3   | 23.8  |

[illegible]

ND<sup>1</sup> = Not Determined, -<sup>\*</sup> = Not Detected.

**Table S5.** Fatty acid composition (%) of total lipids (TL), neutral lipids (NL), glycolipids (GL) and phospholipids (PL) synthesized by *T. striata* growing under different photoperiods.

| Photoperiod               | Lipid | Lipid fraction (%<br>w/w) in TL | Fatty acid composition (%<br>w/w) |       |       |       |           |       |           |           |        |        |       |
|---------------------------|-------|---------------------------------|-----------------------------------|-------|-------|-------|-----------|-------|-----------|-----------|--------|--------|-------|
| (Light:Dark)              | class |                                 | C14:0                             | C16:0 | C16:1 | C18:0 | C18:1 n-9 | C18:2 | C20:1 n-9 | C20:5 n-3 | ΣPUFAs | ΣMUFAs | ΣSFAs |
| Control set<br>24:0 h L:D | TL    |                                 | 5.2                               | 34.6  | 24.9  | 0.9   | 8.2       | 4.0   | 2.4       | 16.6      | 20.7   | 35.5   | 40.7  |
|                           |       |                                 | ± 0.2                             | ± 1.6 | ± 1.9 | ± 0.4 | ± 0.7     | ± 0.1 | ± 0.6     | ± 1.1     | ± 1.4  | ± 0.9  | ± 1.4 |
|                           | NL    | 44.2 ± 0.9                      | 4.7                               | 39.1  | 31.8  | 1.4   | 10.0      | 4.1   | 1.9       | 6.2       | 10.2   | 43.7   | 43.8  |
|                           |       |                                 | ± 0.1                             | ± 1.4 | ± 2.2 | ± 0.8 | ± 1.7     | ± 1.1 | ± 0.7     | ± 0.3     | ± 0.8  | ± 1.2  | ± 1.1 |
|                           | GL    | 45.9 ± 2.0                      | 5.9                               | 37.4  | 25.6  | 1.0   | 6.7       | 3.0   |           | 11.0      | 14.0   | 32.3   | 44.3  |
|                           |       |                                 | ± 0.8                             | ± 1.5 | ± 1.7 | ± 0.0 | ± 0.9     | ± 0.9 | -*        | ± 0.8     | ± 1.3  | ± 0.7  | ± 0.8 |
|                           | PL    | 9.9 ± 0.7                       | 3.3                               | 19.6  | 11.9  | 1.0   | 19.2      | 12.9  | 10.3      | 16.5      | 31.1   | 41.3   | 23.8  |

|             |    |            |       |       |       |       |       |       |       |       |       |       |       |
|-------------|----|------------|-------|-------|-------|-------|-------|-------|-------|-------|-------|-------|-------|
| 20:4 h L:D  | TL |            | ± 0.2 | ± 0.8 | ± 0.1 | ± 0.2 | ± 1.8 | ± 1.2 | ± 0.9 | ± 1.3 | ± 1.5 | ± 1.1 | ± 0.7 |
|             |    |            | 5.1   | 20.7  | 20.6  | 0.3   | 4.4   | 6.0   | 3.1   | 31.5  | 37.9  | 28.1  | 26.1  |
|             |    |            | ± 0.8 | ± 1.6 | ± 0.5 | ± 0.2 | ± 1.6 | ± 2.1 | ± 1.1 | ± 2.1 | ± 1.1 | ± 0.3 | ± 1.9 |
|             | NL | 32.2 ± 1.3 | 4.3   | 28.8  | 30.1  | 0.9   | 6.8   | 6.5   | 3.1   | 11.0  | 17.9  | 40.0  | 33.9  |
|             |    |            | ± 0.2 | ± 2.0 | ± 1.2 | ± 0.3 | ± 1.8 | ± 1.8 | ± 0.7 | ± 0.9 | ± 0.8 | ± 2.1 | ± 1.9 |
|             | GL | 47.3 ± 2.0 | 6.7   | 19.8  | 17.2  | 0.2   | 1.9   | 6.0   | 1.3   | 32.8  | 39.3  | 20.4  | 26.7  |
|             |    |            | ± 1.4 | ± 0.8 | ± 0.9 | ± 0.1 | ± 0.4 | ± 1.4 | ± 0.5 | ± 1.4 | ± 0.3 | ± 0.7 | ± 1.1 |
|             | PL | 20.5 ± 0.9 | 2.5   | 20.0  | 21.4  | 0.3   | 12.2  | 17.9  | 4.7   | 17.3  | 35.6  | 38.2  | 22.8  |
|             |    |            | ± 0.4 | ± 0.2 | ± 1.5 | ± 0.0 | ± 2.1 | ± 0.8 | ± 1.7 | ± 1.2 | ± 2.0 | ± 1.5 | ± 0.3 |
|             | TL |            | 5.2   | 20.9  | 21.0  | 1.4   | 9.1   | 5.5   | 2.7   | 26.4  | 31.9  | 32.8  | 27.6  |
|             |    |            | ± 0.9 | ± 1.4 | ± 1.7 | ± 0.4 | ± 1.8 | ± 1.3 | ± 1.2 | ± 0.2 | ± 1.0 | ± 1.9 | ± 1.2 |
|             |    |            |       |       |       |       |       |       |       |       |       |       |       |
| 18:6 h L:D  | NL | 39.6 ± 1.5 | 5.4   | 24.5  | 30.0  | 1.4   | 8.3   | 6.4   | 2.9   | 14.1  | 21.2  | 41.2  | 31.3  |
|             |    |            | ± 0.6 | ± 1.5 | ± 2.0 | ± 0.2 | ± 0.7 | ± 0.8 | ± 0.8 | ± 0.4 | ± 0.7 | ± 1.4 | ± 1.0 |
|             | GL | 47.6 ± 1.9 | 4.5   | 18.3  | 14.3  | 0.9   | 11.8  | 5.6   | 1.3   | 31.8  | 37.5  | 27.5  | 23.7  |
|             |    |            | ± 1.0 | ± 0.9 | ± 1.9 | ± 0.1 | ± 0.9 | ± 0.7 | ± 0.7 | ± 1.2 | ± 0.7 | ± 0.9 | ± 0.7 |
|             | PL | 13.5 ± 0.9 | 2.2   | 20.9  | 20.9  |       | 19.1  | 21.5  | 3.7   | 10.5  | 32.5  | 43.7  | 23.1  |
|             |    |            | ± 0.5 | ± 1.2 | ± 1.4 | - *   | ± 1.5 | ± 0.8 | ± 1.5 | ± 0.8 | ± 0.7 | 1.1   | ± 0.8 |
| 12:12 h L:D | TL |            | 3.9   | 18.6  | 18.4  | 0.1   | 3.9   | 6.9   | 2.4   | 34.3  | 41.6  | 24.8  | 22.7  |
|             |    |            | ± 1.1 | ± 0.7 | ± 1.3 | ± 0.2 | ± 0.2 | ± 1.5 | ± 0.2 | ± 1.3 | ± 1.2 | ± 1.0 | ± 0.7 |

|    |                 |                 |                 |                 |                 |                 |                 |                 |                 |                 |                 |                 |                 |
|----|-----------------|-----------------|-----------------|-----------------|-----------------|-----------------|-----------------|-----------------|-----------------|-----------------|-----------------|-----------------|-----------------|
| NL | ND <sup>1</sup> |
| GL | ND <sup>1</sup> |
| PL | ND <sup>1</sup> |

ND<sup>1</sup> = Not Determined, -<sup>\*</sup> = Not Detected.

**Table S6.** Fatty acid composition (%) of total lipids (TL), neutral lipids (NL), glycolipids (GL) and phospholipids (PL) synthesized by *T. striata* supplied with CO<sub>2</sub> at different flow rates.

| CO <sub>2</sub> flow rate     | Lipid class | Lipid fraction (%<br>w/w) in TL | Fatty acid composition (% w/w) |       |       |       |           |       |                |           |        |        |       |
|-------------------------------|-------------|---------------------------------|--------------------------------|-------|-------|-------|-----------|-------|----------------|-----------|--------|--------|-------|
|                               |             |                                 | C14:0                          | C16:0 | C16:1 | C18:0 | C18:1 n-9 | C18:2 | C20:1 n-9      | C20:5 n-3 | ΣPUFAs | ΣMUFAs | ΣSFAs |
| No supply<br>(Control<br>set) | TL          |                                 | 5.2                            | 34.6  | 24.9  | 0.9   | 8.2       | 4.0   | 2.4            | 16.6      | 20.7   | 35.5   | 40.7  |
|                               |             |                                 | ± 0.2                          | ± 1.6 | ± 1.9 | ± 0.4 | ± 0.7     | ± 0.1 | ± 0.6          | ± 1.1     | ± 1.4  | ± 0.9  | ± 1.4 |
|                               | NL          | 44.2 ± 0.9                      | 4.7                            | 39.1  | 31.8  | 1.4   | 10.0      | 4.1   | 1.9            | 6.2       | 10.2   | 43.7   | 43.8  |
|                               |             |                                 | ± 0.1                          | ± 1.4 | ± 2.2 | ± 0.8 | ± 1.7     | ± 1.1 | ± 0.7          | ± 0.3     | ± 0.8  | ± 1.2  | ± 1.1 |
|                               | GL          | 45.9 ± 2.0                      | 5.9                            | 37.4  | 25.6  | 1.0   | 6.7       | 3.0   |                | 11.0      | 14.0   | 32.3   | 44.3  |
|                               |             |                                 | ± 0.8                          | ± 1.5 | ± 1.7 | ± 0.0 | ± 0.9     | ± 0.9 | - <sup>*</sup> | ± 0.8     | ± 1.3  | ± 0.7  | ± 0.8 |
|                               | PL          | 9.9 ± 0.7                       | 3.3                            | 19.6  | 11.9  | 1.0   | 19.2      | 12.9  | 10.3           | 16.5      | 31.1   | 41.3   | 23.8  |
|                               |             |                                 | ± 0.2                          | ± 0.8 | ± 0.1 | ± 0.2 | ± 1.8     | ± 1.2 | ± 0.9          | ± 1.3     | ± 1.5  | ± 1.1  | ± 0.7 |
| 10 mL min <sup>-1</sup>       | TL          |                                 | 5.9                            | 25.7  | 23.0  | 0.2   | 5.2       | 6.4   | 3.8            | 23.0      | 29.8   | 32.0   | 31.8  |
|                               |             |                                 | ± 1.1                          | ± 2.0 | ± 0.6 | ± 0.1 | ± 0.8     | ± 0.9 | ± 0.7          | ± 1.6     | ± 1.4  | 0.7    | ± 1.6 |



|                         |    |                 |                 |                 |                 |                 |                 |                 |                 |                 |                 |                 |                 |
|-------------------------|----|-----------------|-----------------|-----------------|-----------------|-----------------|-----------------|-----------------|-----------------|-----------------|-----------------|-----------------|-----------------|
| 20 mL min <sup>-1</sup> | NL | 30.8 ± 2.1      | 4.8             | 36.1            | 33.2            | 0.4             | 6.9             | 4.6             | 2.9             | 6.8             | 11.7            | 43.0            | 41.4            |
|                         |    |                 | ± 0.8           | ± 1.1           | ± 1.2           | ± 0.2           | ± 1.3           | ± 1.0           | ± 0.7           | ± 0.8           | ± 1.5           | ± 0.9           | ± 1.0           |
|                         | GL | 55.1 ± 1.7      | 8.0             | 21.8            | 18.5            |                 | 1.9             | 5.7             | 1.9             | 29.7            | 35.4            | 22.3            | 29.8            |
|                         |    |                 | ± 1.7           | ± 0.8           | ± 1.8           | - *             | ± 0.4           | ± 0.7           | ± 0.3           | ± 2.1           | ± 1.8           | ± 1.3           | ± 1.1           |
|                         | PL | 15.1 ± 2.0      | 2.0             | 20.2            | 17.4            | 0.3             | 13.7            | 18.9            | 6.8             | 17.0            | 35.9            | 37.9            | 22.4            |
|                         |    |                 | ± 0.5           | ± 0.8           | ± 0.2           | ± 0.0           | ± 1.2           | ± 0.1           | ± 1.3           | ± 1.6           | ± 1.5           | ± 1.9           | ± 0.7           |
|                         | TL |                 | 5.9             | 31.4            | 21.0            | 0.6             | 11.5            | 6.3             | 2.8             | 14.7            | 21.0            | 35.3            | 37.9            |
|                         |    |                 | ± 1.1           | ± 2.2           | ± 0.8           | ± 0.3           | ± 1.2           | ± 1.1           | ± 0.8           | ± 1.2           | ± 1.1           | ± 1.6           | ± 1.6           |
|                         | NL | ND <sup>1</sup> |
|                         | GL | ND <sup>1</sup> |
|                         | PL | ND <sup>1</sup> |

---

ND<sup>1</sup> = Not Determined, - \* = Not Detected.

## Carotenoid Analysis

The wet microalgae biomass was centrifuged while a clean-up protocol was applied to remove seawater salts (Mohamed et al., 2014). In detail, 50 mL of wet microalgae biomass was centrifuged using a refrigerated centrifuge at 7000 rpm for 5 minutes at 5°C and the upper layer was discarded. Then 20 mL of ammonium formate 0.5 M was added. Again, the samples were vortexed and centrifuged, and the upper layer was discarded. A further two washing steps followed using 50 mL of deionized water each time, following the same procedure. After the last centrifuge, the pellet was transferred into a clean tube with as little deionized water as possible and was placed in a freezer at -20°C. The next day all samples were lyophilized in a freeze-dryer. The dry microalgae biomass that was produced was then homogenized with a mortar and pestle and was kept at -20°C for further carotenoid analysis. All samples were processed under the same conditions in all steps followed. A carotenoid solid-liquid extraction (SLE) was developed based on methods already published in the literature with some modifications.

Determination and quantification of the targeted carotenoids (astaxanthin, lutein, zeaxanthin, canthaxanthin, b-cryptoxanthin, echinenone, lycopene and b-carotene) were performed using a UPLC H-Class -QTOF-MS system (Waters Corp., Millford, MA, USA). The chromatographic separation was carried out on a C18 BEH column (50 mm × 2.1 mm, 1.7 µm, Waters). Mobile phases consisted of 0.1% aqueous FA (solvent A) and acetonitrile with 0.1% FA (solvent B). A gradient flow rate and elution program were selected for carotenoids separation as follows: 85-79% A from 0 to 2 min; 79-75% from 2 to 5 min; 75-15% from 5 to 7 min; 15-85 from 7 to 8 min; equilibrate at 85% from 8 to 10 min. Column temperature was maintained at 32°C and the sample's temperature was 15°C. The injection volume was 5 µL. Data acquisition and analysis were executed on MassLynx 4.1 software. Standard stock solutions (1000 µg/mL) of all carotenoids and internal standard (trans-8'-apo-β-caroten-8'-al) were prepared in dichloromethane and stored at -20°C.

The qTOF-MS detector was operated using an orthogonal-V electrospray ionization interface (ESI) in positive mode. The electrospray voltage was 3.5 kV and the sample cone voltage was 20 V. The extraction cone voltage was 5 V and the MCP plates were operated at 1800 V. The source temperature was 100°C and the desolvation temperature was set at 300°C. Nitrogen was used as the desolvation and cone gas and was set at 600 and 50 L h<sup>-1</sup>, respectively. The analyzer was operated in the V optics mode at a resolution (FWHM) of 9000 ± 500. The collision gas used was argon. Ion acquisition was performed at a rate of 10 spectrums per second in continuum mode from m/z 50–600, using multiple SIM functions on a narrow time window specific for each carotenoid according to their retention times monitoring their precursor ion [M+H]<sup>+</sup>.

Leucine encephalin was used as a reference material for mass spectrometer tuning and calibration compound (m/z 556.2771) that was infused at 4 L min<sup>-1</sup> at a concentration of 200 ng/mL in order to maintain mass accuracy avoiding shifting due to temperature changes. For the lock mass spectrum, the scan time was set to 1 s with a frequency of 10 s. For mass calibration, a solution of sodium formate (10% FA/0.1 M NaOH/ACN) at a ratio of (1/1/8) was used.

## References

1. do Nascimento, T.; Nass, P.; Fernandes, A.; Vieira, K.; Wagner, R.; Jacob-Lopes, E.; Zepka, L. Exploratory data of the microalgae compounds for food purposes. *Data Br.*, **2020**, *29*, 105182.
2. Vendruscolo, R.; Fernandes, A.; Fagundes, M.; Zepka, L.; de Menezes, C.; Jacob-Lopes, E.; Wagner, R. Development of a new method for simultaneous extraction of chlorophylls and carotenoids from microalgal biomass. *J. Appl. Phycol.* **2021**, *33*, 1987-1997.

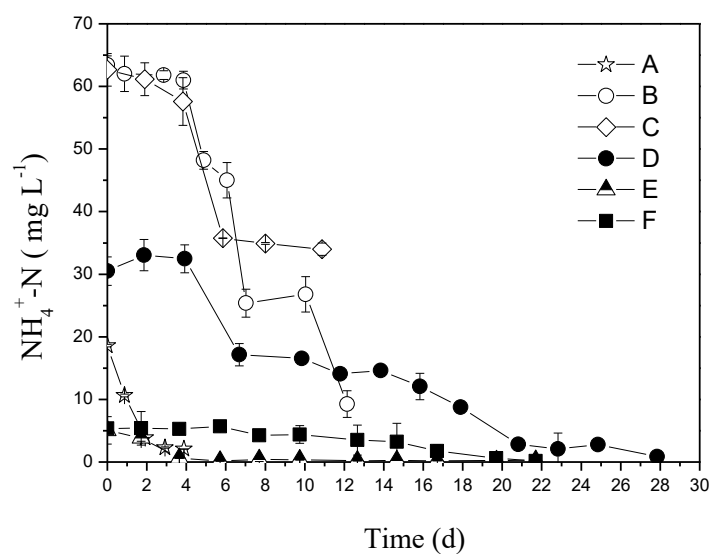

**Figure S1.**  $\text{NH}_4^+\text{-N}$  removal over time from the different growth substrates. Experimental sets: A (Salinity  $3.9 \pm 0.1\%$ , N:P $\approx$ 5), B (Salinity  $3.9 \pm 0.1\%$ , N:P $\approx$ 12), C (Salinity  $2.8 \pm 0.1\%$ , N:P $\approx$ 12), D: (Salinity  $2.8 \pm 0.1\%$ , Modified F/2), E (Salinity  $2.8 \pm 0.1\%$ , Nutri-Leaf 30-10-10 without  $\text{NaHCO}_3$ ), and F (Salinity  $2.8 \pm 0.1\%$ , Nutri-Leaf 30-10-10 with  $\text{NaHCO}_3$ ).

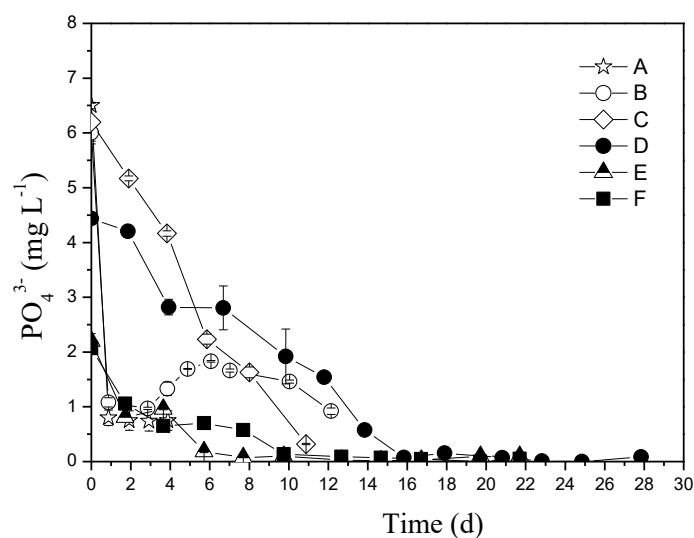

**Figure S2.**  $\text{PO}_4^{3-}$  removal over time from the different growth substrates. Experimental sets: A (Salinity  $3.9 \pm 0.1\%$ , N:P $\approx$ 5), B (Salinity  $3.9 \pm 0.1\%$ , N:P $\approx$ 12), C (Salinity  $2.8 \pm 0.1\%$ , N:P $\approx$ 12), D: (Salinity  $2.8 \pm 0.1\%$ , Modified F/2), E (Salinity  $2.8 \pm 0.1\%$ , Nutri-Leaf 30-10-10 without  $\text{NaHCO}_3$ ), and F (Salinity  $2.8 \pm 0.1\%$ , Nutri-Leaf 30-10-10 with  $\text{NaHCO}_3$ ).

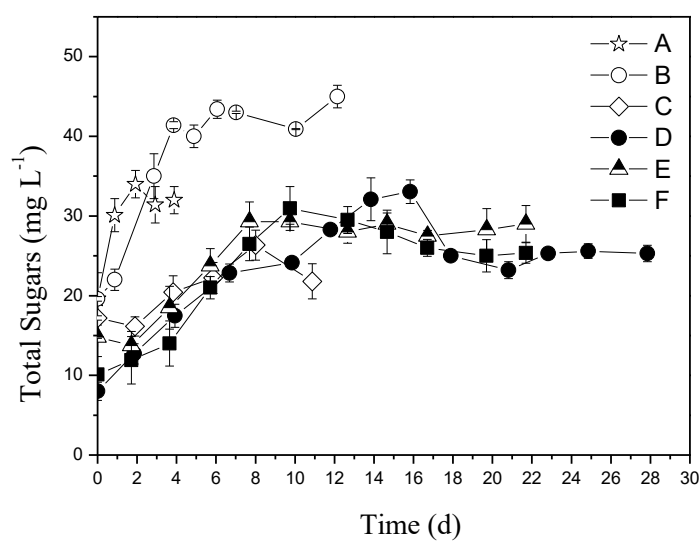

**Figure S3.** Total sugar production over time from the different growth substrates. Experimental sets: A (Salinity  $3.9 \pm 0.1\%$ , N:P $\approx$ 5), B (Salinity  $3.9 \pm 0.1\%$ , N:P $\approx$ 12), C (Salinity  $2.8 \pm 0.1\%$ , N:P $\approx$ 12), D: (Salinity  $2.8 \pm 0.1\%$ , Modified F/2), E (Salinity  $2.8 \pm 0.1\%$ , Nutri-Leaf 30-10-10 without  $\text{NaHCO}_3$ ), and F (Salinity  $2.8 \pm 0.1\%$ , Nutri-Leaf 30-10-10 with  $\text{NaHCO}_3$ ).

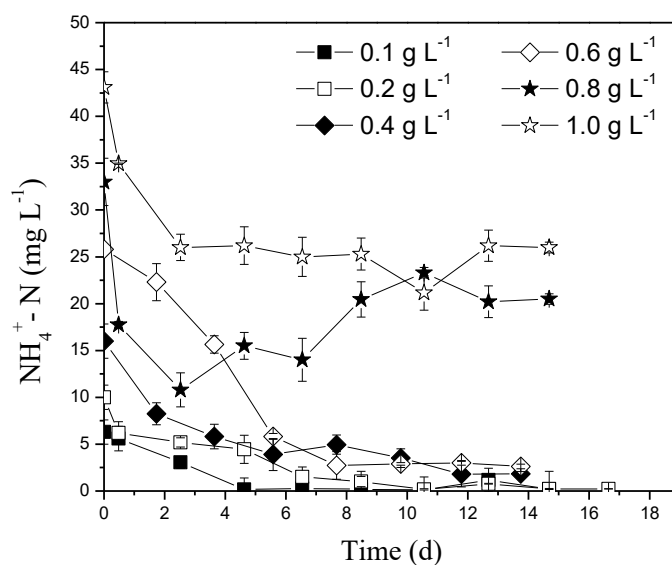

**Figure S4.**  $\text{NH}_4^+$ -N removal over time applying different initial fertilizer quantities.

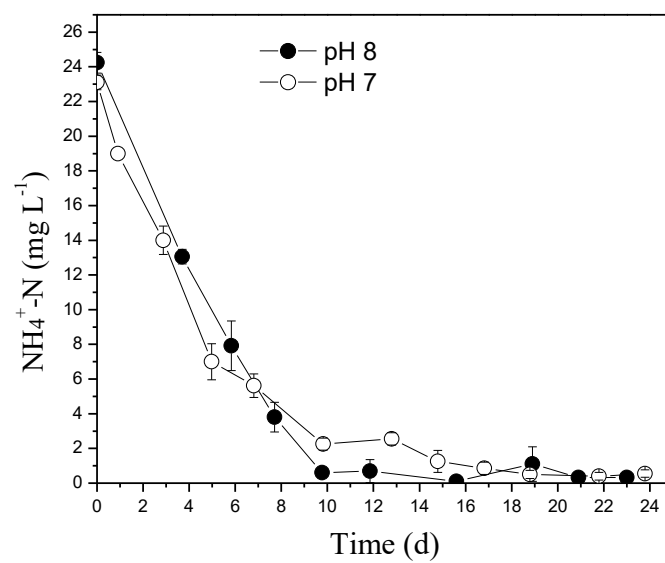

**Figure S5.**  $\text{NH}_4^+\text{-N}$  removal over time during the pH experiments.

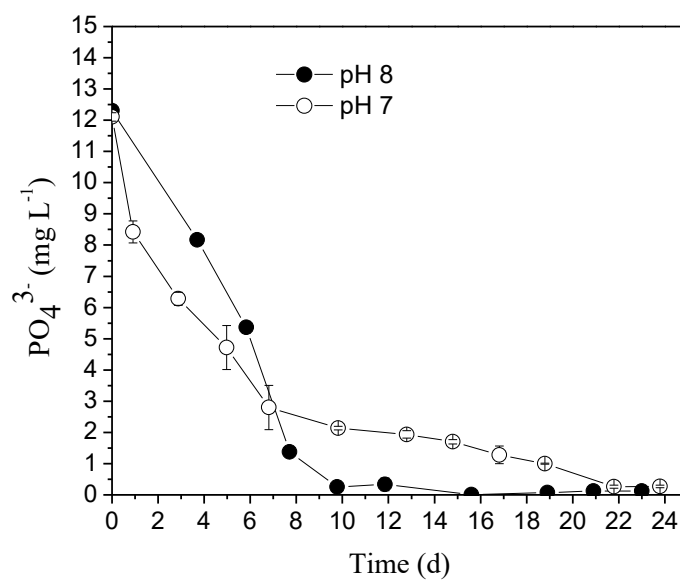

**Figure S6.**  $\text{PO}_4^{3-}$  removal over time during the pH experiments.

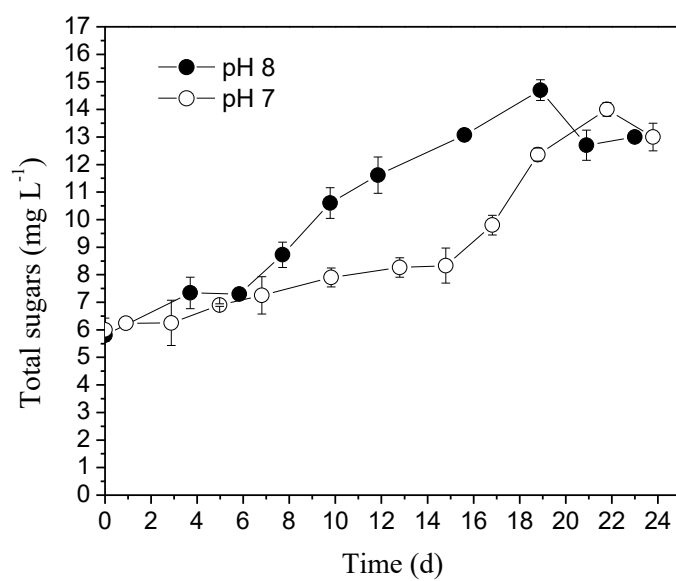

**Figure S7.** Total sugar production over time during the pH experiments.

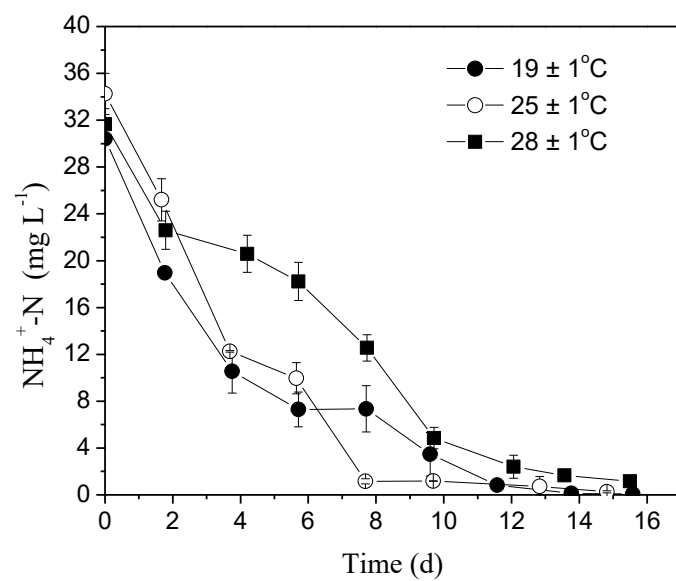

**Figure S8.** NH<sub>4</sub><sup>+</sup>-N removal over time during the temperature experiments.

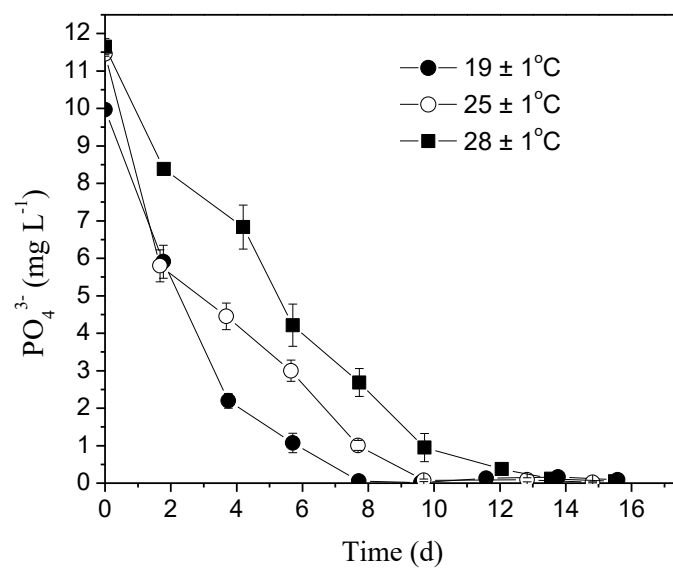

**Figure S9.**  $\text{PO}_4^{3-}$  removal over time during the temperature experiments.

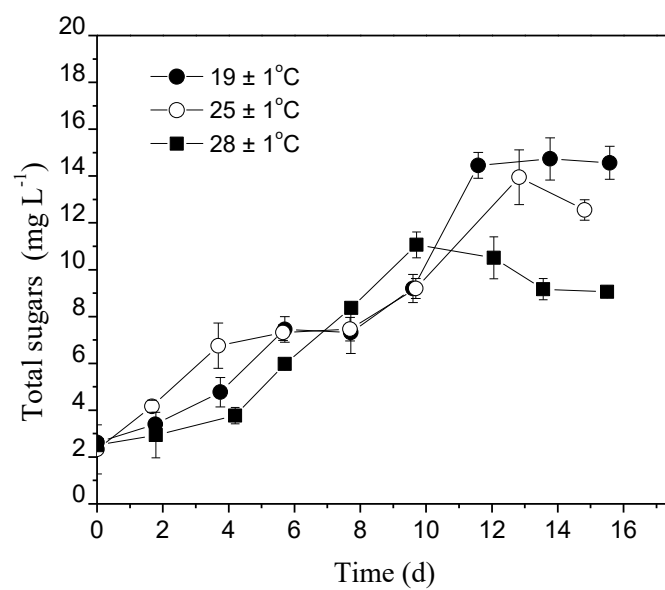

**Figure S10.** Total sugar production over time during the temperature experiments.

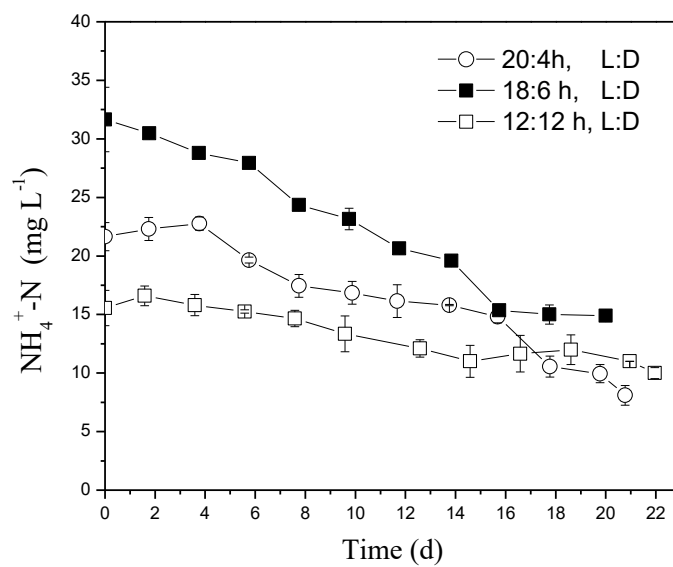

**Figure S11.**  $\text{NH}_4^+\text{-N}$  removal over time during the photoperiod experiments.

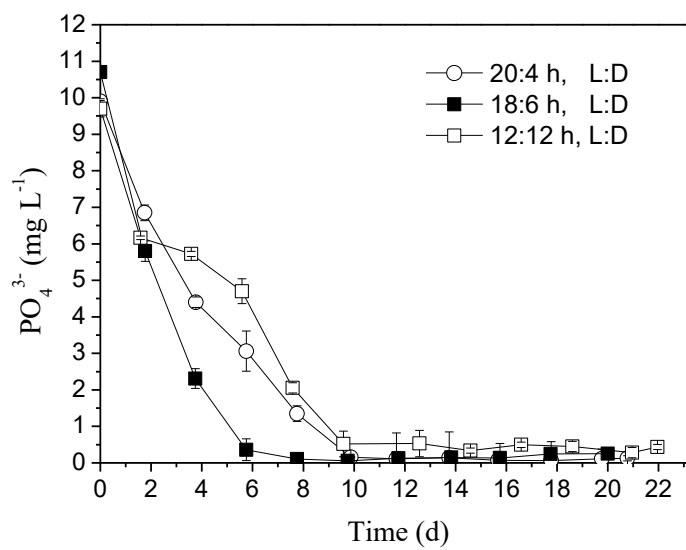

**Figure S12.**  $\text{PO}_4^{3-}$  removal over time during the photoperiod experiments.



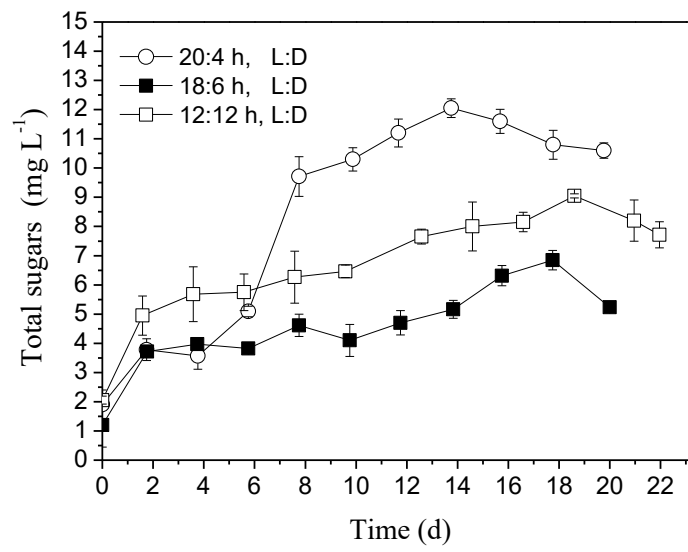

**Figure S13.** Total sugar production over time during the photoperiod experiments.

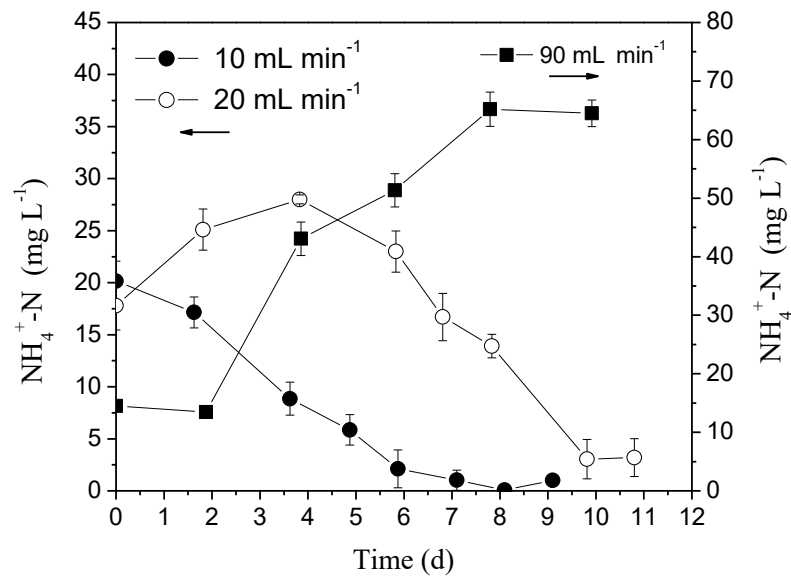

**Figure S14.**  $\text{NH}_4^+\text{-N}$  removal over time during the  $\text{CO}_2$  experiments.

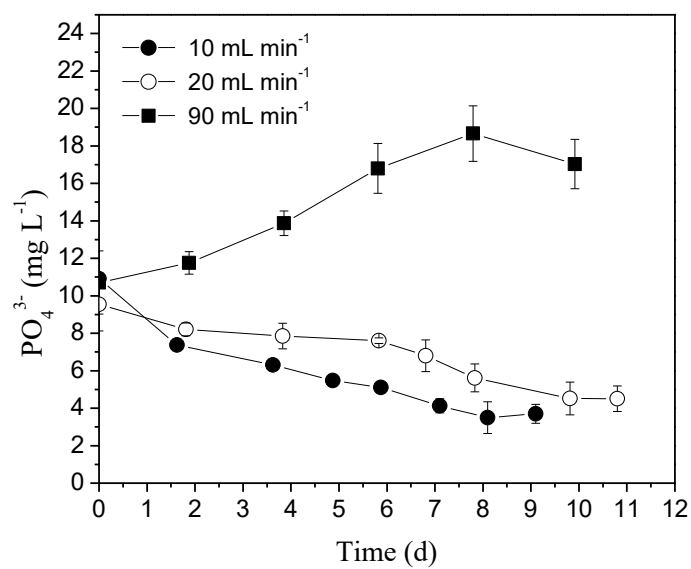

**Figure S15.**  $\text{PO}_4^{3-}$  removal over time during the  $\text{CO}_2$  experiments.

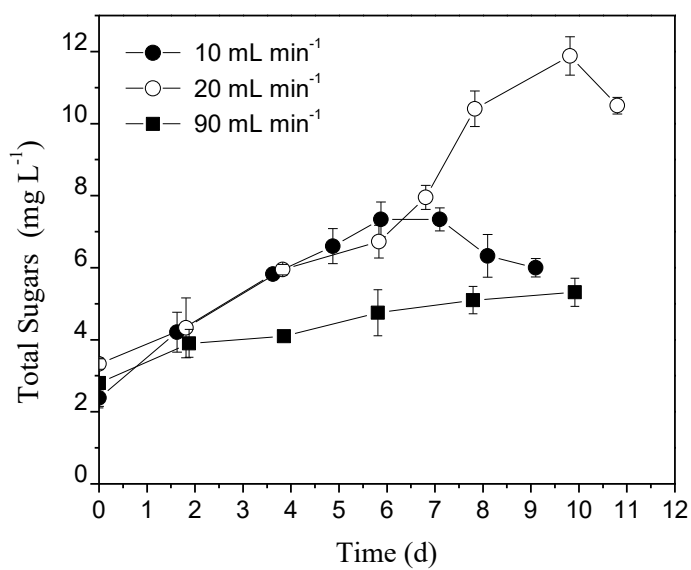

**Figure S16.** Total sugar production over time during the  $\text{CO}_2$  experiments.
